# Supplementary material
Source: PubMed Central journal article supplement (PMC3275158)

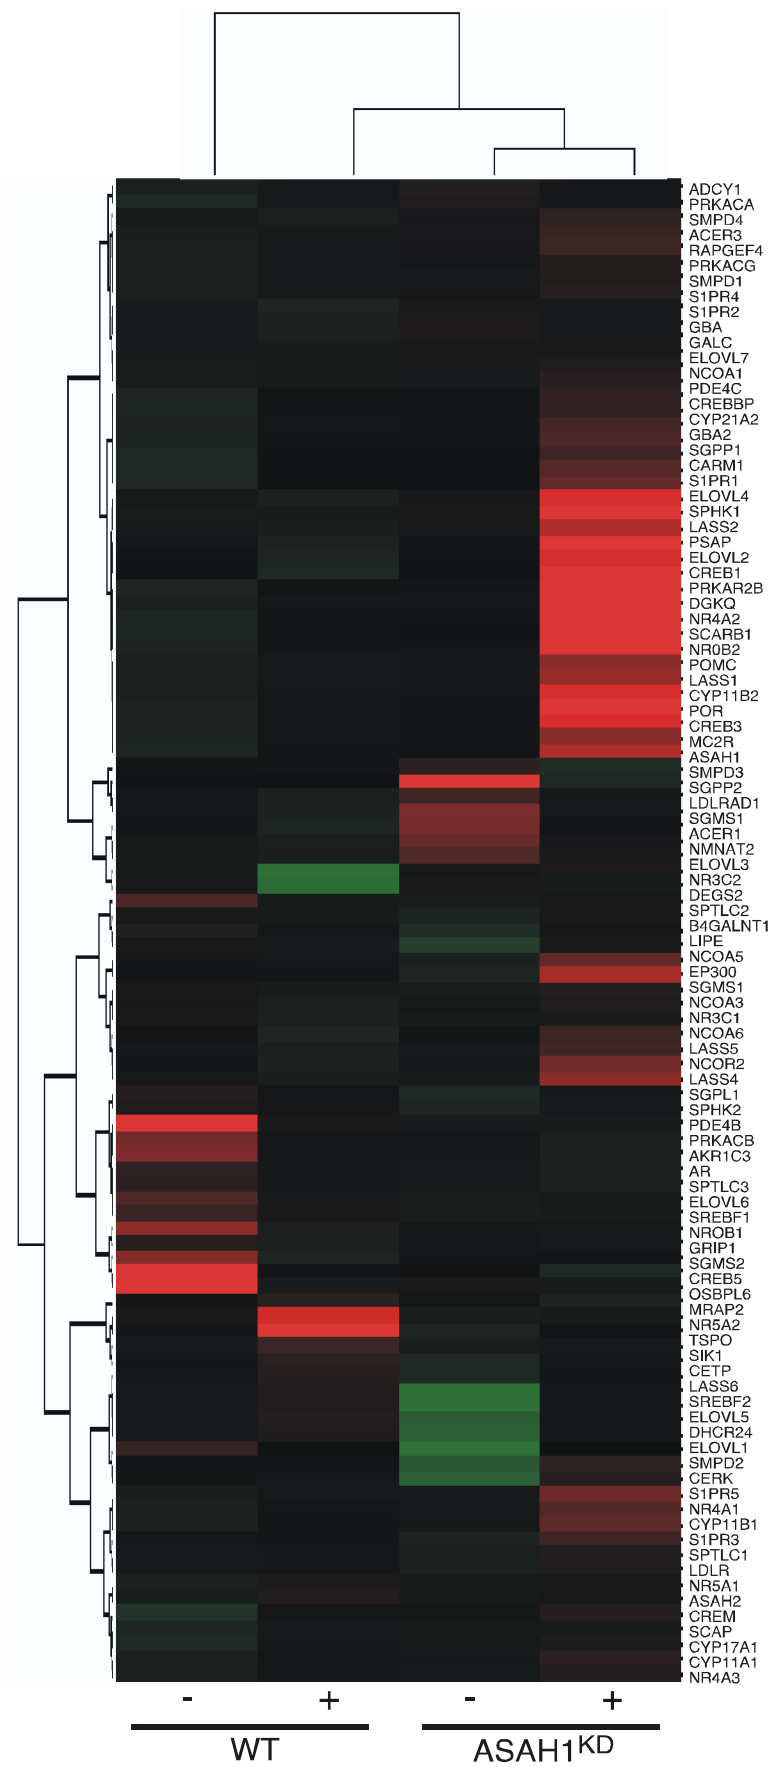

-4.00 4.00

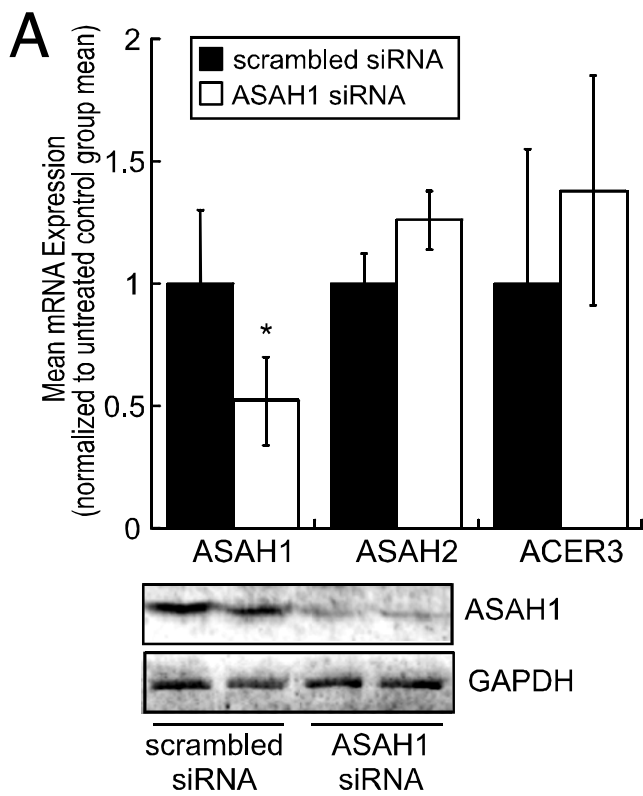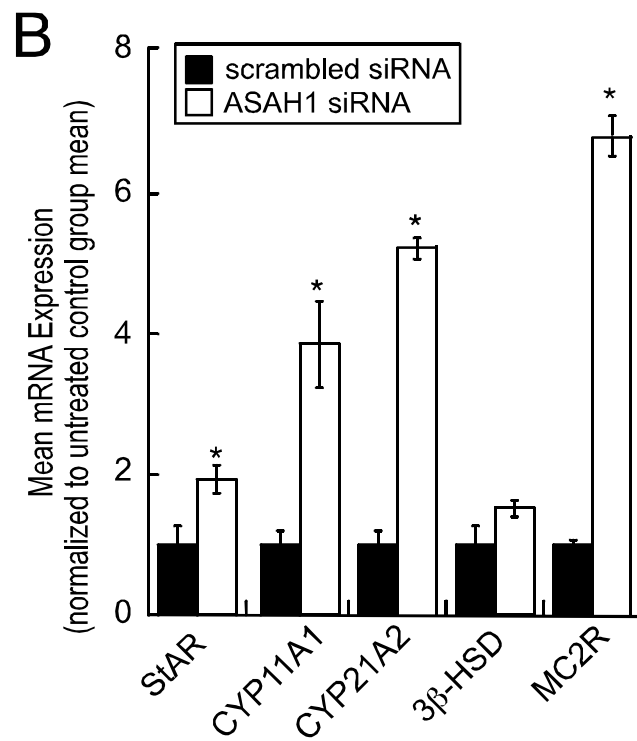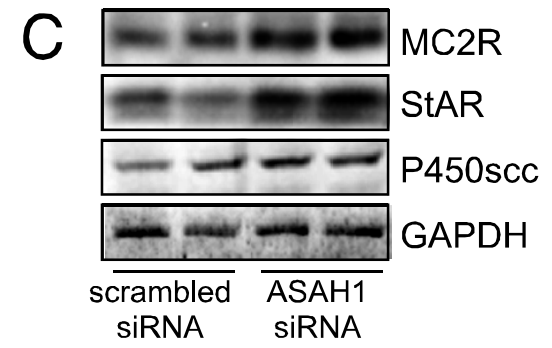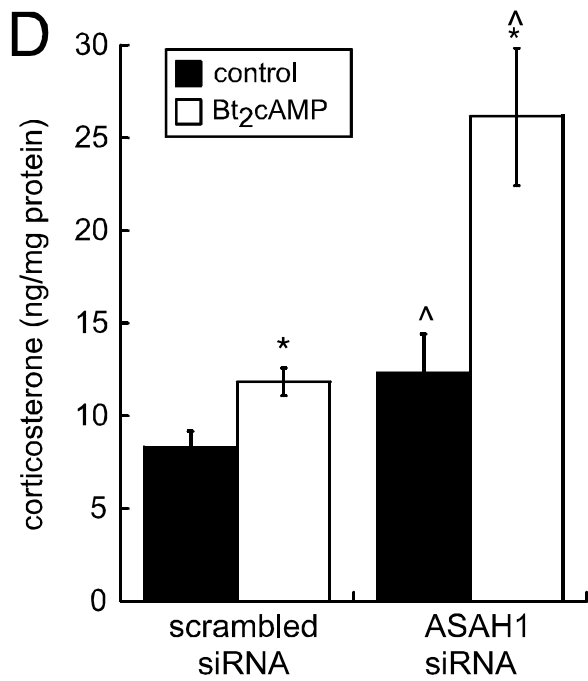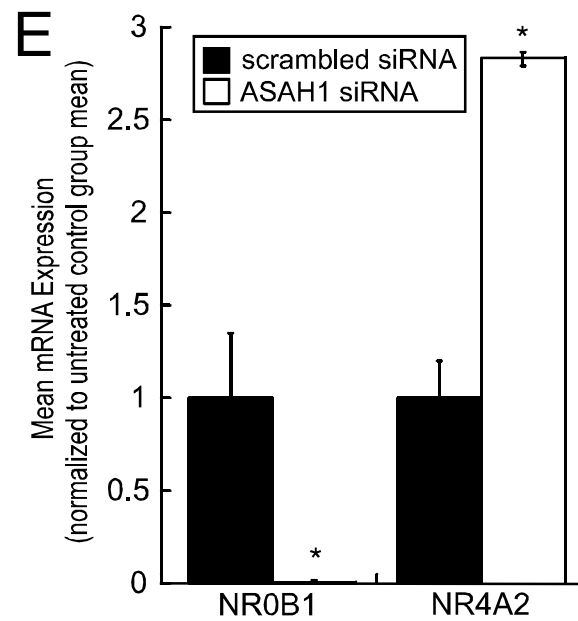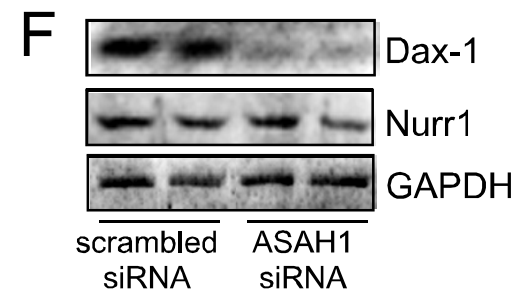

Supplement: supp_me.2011-1150_me-11-1150_tabs_1and_2_maybeLuckietalSupplFigs.pdf [file supp_me.2011-1150_me-11-1150_tabs_1and_2_maybeLuckietalSupplFigs.pdf]
